# Supplementary material for: Emerging and Novel Viruses in Passerine Birds
Source: MDPI journal article supplement (doi:10.3390/microorganisms11092355), 2023-09-20
Supplement: s1 [file s1]

# EMERGING AND NOVEL VIRUSES IN PASSERINE BIRDS

***Richard AJ Williams<sup>1,3</sup>; Christian Sánchez<sup>1</sup>, Ana Doménech<sup>2,3</sup>, Ricardo Madrid<sup>1,3</sup>; Sergio Fandiño<sup>2,3</sup>; Pablo Cea-Calleja<sup>1,3</sup>, Esperanza Gomez-Lucia<sup>2,3</sup>, Laura Benítez<sup>1,3</sup>***

<sup>1</sup>*Department of Genetics, Physiology, and Microbiology, School of Biology, Complutense University of Madrid (UCM), C. de José Antonio Nováis, 12, 28040, Madrid, Spain*

<sup>2</sup>*Department of Animal Health, Veterinary Faculty, Complutense University of Madrid, Av. Puerta de Hierro, s/n, 28040, Madrid, Spain*

<sup>3</sup>*“Animal viruses” Research Group, Complutense University of Madrid, Madrid, Spain*

## **SUPPLEMENTARY MATERIAL: TABLES S1: List of bird species**

**Table S1:** List of bird species, or more general bird names, cited in this review, following Clements 2021 [1]. Note: this list aims to provide background on the taxonomy of birds listed in this review.

| Common species name    | Scientific name                 | Avian family   | Order         |
|------------------------|---------------------------------|----------------|---------------|
| American cliff swallow | <i>Petrochelidon pyrrhonota</i> | Hirundidae     | Passeriformes |
| American crow          | <i>Corvus brachyrhynchos</i>    | Corvidae       | Passeriformes |
| American robin         | <i>Turdus migratorius</i>       | Turdidae       | Passeriformes |
| Australian magpie      | <i>Gymnorhina tibicen</i>       | Artamidae      | Passeriformes |
| Australian raven       | <i>Corvus coronoides</i>        | Corvidae       | Passeriformes |
| Black-billed magpie    | <i>Pica hudsonia</i>            | Corvidae       | Passeriformes |
| Black-capped chickadee | <i>Poecile atricapillus</i>     | Paridae        | Passeriformes |
| Black-faced quailfinch | <i>Ortygospiza atricollis</i>   | Estrildidae    | Passeriformes |
| Black-headed antbird   | <i>Pernostola rufifrons</i>     | Thamnophilidae | Passeriformes |

|                                 |                                        |                |               |
|---------------------------------|----------------------------------------|----------------|---------------|
| Black-naped monarch             | <i>Hypothymis azurea</i>               | Monarchidae    | Passeriformes |
| Black-rumped waxbill            | <i>Estrilda troglodytes</i>            | Estrildidae    | Passeriformes |
| Black-throated finch            | <i>Poephila cincta</i>                 | Estrildidae    | Passeriformes |
| Blue jay                        | <i>Cyanocitta cristata</i>             | Corvidae       | Passeriformes |
| Brambling                       | <i>Fringilla montifringilla</i>        | Fringillidae   | Passeriformes |
| Cardinals and allies            |                                        | Cardinalidae   | Passeriformes |
| Chestnut-bellied seed-finch     | <i>Sporophila angolensis</i>           | Estrildidae    | Passeriformes |
| Chinese bulbul                  | <i>Pycnonotus sinensis</i>             | Pycnonotidae   | Passeriformes |
| Common blackbird                | <i>Turdus merula</i>                   | Turdidae       | Passeriformes |
| Common chaffinch                | <i>Fringilla coelebs</i>               | Fringillidae   | Passeriformes |
| Cormorants                      |                                        | Sulidae        | Suliformes    |
| Crows, jays, and magpies        |                                        | Corvidae       | Passeriformes |
| Daurian redstart                | <i>Phoenicurus auroreus</i>            | Muscicapidae   | Passeriformes |
| Domestic canary                 | <i>Serinus canaria forma domestica</i> | Fringillidae   | Passeriformes |
| Domestic chicken or fowl        | <i>Gallus gallus domesticus</i>        | Phasianidae    | Galliformes   |
| Ducks, geese, swans (waterfowl) |                                        | Anatidae       | Anseriformes  |
| Dunnock                         | <i>Prunella modularis</i>              | Prunellidae    | Passeriformes |
| Eastern spinebill               | <i>Acanthorhynchus tenuirostris</i>    | Meliphagidae   | Passeriformes |
| Waxbills and allies             |                                        | Estrildidae    | Passeriformes |
| Eurasian blackcap               | <i>Sylvia atricapilla</i>              | Sylviidae      | Passeriformes |
| Eurasian blue tit               | <i>Cyanistes caeruleus</i>             | Paridae        | Passeriformes |
| Eurasian hawfinch               | <i>Coccothraustes coccothraustes</i>   | Fringillidae   | Passeriformes |
| Eurasian jackdaw                | <i>Corvus monedula</i>                 | Corvidae       | Passeriformes |
| Eurasian robin                  | <i>Erithacus rubecula</i>              | Muscicapidae   | Passeriformes |
| Eurasian starling               |                                        | Sturnidae      | Passeriformes |
| European goldfinch              | <i>Carduelis carduelis</i>             | Fringillidae   | Passeriformes |
| European greenfinch             | <i>Chloris chloris</i>                 | Fringillidae   | Passeriformes |
| Falcons (raptors)               |                                        | Falconidae     | Falconiformes |
| Ferruginous-backed antbird      | <i>Myrmoderus ferruginea</i>           | Thamnophilidae | Passeriformes |

|                                      |                                 |              |                 |
|--------------------------------------|---------------------------------|--------------|-----------------|
| Goshawk                              | <i>Accipiter gentilis</i>       | Accipitridae | Accipitriformes |
| Gouldian finch                       | <i>Chloebia gouldiae</i>        | Estrildidae  | Passeriformes   |
| Gray-backed thrush                   | <i>Turdus hortulorum</i>        | Turdidae     | Passeriformes   |
| Great tit                            | <i>Parus major</i>              | Paridae      | Passeriformes   |
| Green-and-gold tanager               | <i>Tangara schrankii</i>        | Thraupidae   | Passeriformes   |
| Grey pileated finch                  | <i>Coryphospingus pileatus</i>  | Thraupidae   | Passeriformes   |
| Gulls                                |                                 | Laridae      | Charadriiformes |
| Hawaiian 'elepaio                    | <i>Chasiempis sandwichensis</i> | Monarchidae  | Passeriformes   |
| Hawks, eagles and kites<br>(raptors) |                                 | Accipitridae | Accipitriformes |
| Hérons, egrets and bitterns          |                                 | Ardeidae     | Suliformes      |
| Hooded crow                          | <i>Corvus cornix</i>            | Corvidae     | Passeriformes   |
| House finch                          | <i>Haemorhous mexicanus</i>     | Fringillidae | Passeriformes   |
| House sparrow                        | <i>Passer domesticus</i>        | Passeridae   | Passeriformes   |
| Icterids (New world blackbirds)      |                                 | Icteridae    | Passeriformes   |
| Indian myna                          | <i>Acridotheres tristis</i>     | Sturnidae    | Passeriformes   |
| Jacky winter                         | <i>Microeca fascinans</i>       | Petroicidae  | Passeriformes   |
| Japanese white-eye                   | <i>Zosterops japonicus</i>      | Zosteropidae | Passeriformes   |
| Java sparrow                         | <i>Lonchura oryzivora</i>       | Estrildidae  | Passeriformes   |
| Kurrichane Thrush                    | <i>Turdus libonyana</i>         | Turdidae     | Passeriformes   |
| Larks                                |                                 | Alaudidae    | Passeriformes   |
| Little greenbul                      | <i>Eurillas virens</i>          | Pynonotidae  | Passeriformes   |
| Long-tailed finch                    | <i>Poephila acuticauda</i>      | Estrildidae  | Passeriformes   |
| Magpie lark                          | <i>Grallina cyanoleuca</i>      | Monarchidae  | Passeriformes   |
| Marsh tit                            | <i>Poecile palustris</i>        | Paridae      | Passeriformes   |
| Masked finch                         | <i>Poephila personata</i>       | Estrildidae  | Passeriformes   |
| New Zealand robin                    | <i>Petroica australis</i>       | Petroicidae  | Passeriformes   |
| Noisy miner                          | <i>Manorina melanocephala</i>   | Meliphagidae | Passeriformes   |
| Old world flycatchers                |                                 | Muscicapidae | Passeriformes   |

|                                                                               |                               |                |                                |
|-------------------------------------------------------------------------------|-------------------------------|----------------|--------------------------------|
| Old world sparrows                                                            |                               | Passeridae     | Passeriformes                  |
| Orchard oriole                                                                | <i>Icterus spurius</i>        | Icteridae      | Passeriformes                  |
| Owls                                                                          |                               | Strigidae      | Strigiformes                   |
| Pale thrush                                                                   | <i>Turdus palidus</i>         | Turdidae       | Passeriformes                  |
| Parrots                                                                       |                               | Psittacidae    | Psittaciformes                 |
| New world warblers                                                            | Parulidae                     | Parulidae      | Passeriformes                  |
| Pigeons                                                                       |                               | Columbidae     | Columbiformes                  |
| Weavers                                                                       | Ploceidae                     | Ploceidae      | Passeriformes                  |
| Quail (common name applied to species from two families in order Galliformes) |                               | Phasianidae    | Galliformes;<br>Odontophoridae |
| Red avadavat                                                                  | <i>Amandava amandava</i>      | Estrildidae    | Passeriformes                  |
| Red-billed fire finch                                                         | <i>Lagonosticta senegala</i>  | Estrildidae    | Passeriformes                  |
| Red-billed quelea                                                             | <i>Quelea quelea</i>          | Ploceidae      | Passeriformes                  |
| Red-throated parrot finch                                                     | <i>Erythrura psittacea</i>    | Estrildidae    | Passeriformes                  |
| Red-whiskered bulbul                                                          | <i>Pycnonotus jocosus</i>     | Pycnonotidae   | Passeriformes                  |
| Reed bunting                                                                  | <i>Emberiza schoeniclus</i>   | Emberizidae    | Passeriformes                  |
| Rock dove                                                                     | <i>Columba livia</i>          | Columbidae     | Columbiformes                  |
| Rufous-collared sparrow                                                       | <i>Zonotrichia capensis</i>   | Emberizidae    | Passeriformes                  |
| Rufous-rumped foliage-gleaner                                                 | <i>Philydor erythrocercum</i> | Furnariidae    | Passeriformes                  |
| Rufous-throated antbird                                                       | <i>Gymnopithys rufigula</i>   | Thamnophilidae | Passeriformes                  |
| Short-toed lark                                                               | <i>Calandrella rufescens</i>  | Alaudidae      | Passeriformes                  |
| Siberian accentor                                                             | <i>Prunella montanella</i>    | Prunellidae    | Passeriformes                  |
| Silvereye                                                                     | <i>Zosterops lateralis</i>    | Zosteropidae   | Passeriformes                  |
| Song thrush                                                                   | <i>Turdus philomelos</i>      | Turdidae       | Passeriformes                  |
| Southern house wren                                                           | <i>Troglodytes musculus</i>   | Troglodytidae  | Passeriformes                  |
| Spotless starling                                                             |                               | Sturnidae      | Passeriformes                  |
| Starlings                                                                     |                               | Sturnidae      | Passeriformes                  |
| Superb starling                                                               | <i>Lamprotornis superbus</i>  | Sturnidae      | Passeriformes                  |

|                               |                                |                                       |                 |
|-------------------------------|--------------------------------|---------------------------------------|-----------------|
| Swallows                      |                                | Hirundidae                            | Passeriformes   |
| Red-flanked bluetail          | <i>Tarsiger cyanurus</i>       | Muscicapidae                          | Passeriformes   |
| Thrushes                      | <i>Turdus</i> sp.              | Turdidae                              | Passeriformes   |
| Tomtit                        | <i>Petroica macrocephala</i>   | Petroicidae                           | Passeriformes   |
| Tree sparrow                  | <i>Passer montanus</i>         | Passeridae                            | Passeriformes   |
| True finches                  |                                | Fringillidae                          | Passeriformes   |
| Turkey                        | <i>Meleagris gallopavo</i>     | Phasianidae                           | Galliformes     |
| Violet-eared waxbill          | <i>Granatina granatina</i>     | Estrildidae                           | Passeriformes   |
| Vitelline masked weaver       | <i>Ploceus vitellinus</i>      | Ploceidae                             | Passeriformes   |
| Waders and shorebirds         |                                | Charadriidae;<br>Scolopaciidae (etc.) | Charadriiformes |
| Whinchat                      | <i>Saxicola rubetra</i>        | Muscicapidae                          | Passeriformes   |
| White-plumed antbird          | <i>Pithys albifrons</i>        | Thamnophilidae                        | Passeriformes   |
| White-rumped munia            | <i>Lonchura striata</i>        | Estrildidae                           | Passeriformes   |
| White-throated laughingthrush | <i>Pterorhinus albogularis</i> | Leiothrichidae                        | Passeriformes   |
| Wood thrush                   | <i>Hylocichla mustelina</i>    | Turdidae                              | Passeriformes   |
| Yellow wagtail                | <i>Motacilla flava</i>         | Motacillidae                          | Passeriformes   |
| Yellow-browed bunting         | <i>Emberiza chrysophrys</i>    | Emberizidae                           | Passeriformes   |
| Yellow-browed warbler         | <i>Phylloscopus inornatus</i>  | Phylloscopidae                        | Passeriformes   |
| Yellow-throated bunting       | <i>Emberiza elegans</i>        | Emberizidae                           | Passeriformes   |
| Yellow-winged pytilia         | <i>Pytilia hypogrammica</i>    | Estrildidae                           | Passeriformes   |
| Zebra finch                   | <i>Taeniopygia guttata</i>     | Estrildidae                           | Passeriformes   |

1. Clements, J.; Schulenberg, T.; Iliff, M.; Billerman, S.; Fredericks, T.; Gerbracht, J.; Woods, C. Checklist of Birds of the World Available online: <https://www.birds.cornell.edu/clementschecklist/download/>. (accessed on 19 July 2023).
