# Supplementary material for: Emerging and Novel Viruses in Passerine Birds
Source: MDPI journal article supplement (doi:10.3390/microorganisms11092355), 2023-09-20
Supplement: s1 [file s1]

# EMERGING AND NOVEL VIRUSES IN PASSERINE BIRDS

***Richard AJ Williams<sup>1,3</sup>; Christian Sánchez<sup>1</sup>, Ana Doménech<sup>2,3</sup>, Ricardo Madrid<sup>1,3</sup>; Sergio Fandiño<sup>2,3</sup>; Pablo Cea-Calleja<sup>1,3</sup>; Esperanza Gomez-Lucia<sup>2,3</sup>, Laura Benítez<sup>1,3</sup>***

<sup>1</sup>Department of Genetics, Physiology, and Microbiology, School of Biology, Complutense University of Madrid (UCM), C. de José Antonio Nováis, 12, 28040, Madrid, Spain

<sup>2</sup>Department of Animal Health, Veterinary Faculty, Complutense University of Madrid, Av. Puerta de Hierro, s/n, 28040, Madrid, Spain

<sup>3</sup> “Animal viruses” Research Group, Complutense University of Madrid, Madrid, Spain

## **SUPPLEMENTARY MATERIAL: TABLES S2: List of avian families**

**Table S2:** List of avian families mentioned in this review, following Clements 2021 [1], concentrating on families from order Passeriformes, but also including non-Passeriformes at the end of the table. The number of species belonging to the family is shown. Additional information is available for WNV and USUV (Table S3 and Table S4), and Poxviridae [2].

| Order         | Latin avian family name | Common family name                    | Number of species in family | Viruses cited in this family in this review                                                       |
|---------------|-------------------------|---------------------------------------|-----------------------------|---------------------------------------------------------------------------------------------------|
| Passeriformes | Alaudidae               | Larks                                 | 99                          | <i>Hepeviridae; Poxviridae</i>                                                                    |
| Passeriformes | Artamidae               | Woodswallows, Bellmagpies, and Allies | 24                          | <i>Circoviridae</i>                                                                               |
| Passeriformes | Cardinalidae            | Cardinals and Allies                  | 49                          | <i>Hepeviridae</i>                                                                                |
| Passeriformes | Corvidae                | Crows, Jays, and Magpies              | 128                         | <i>Bornaviridae; Circoviridae; Flaviviridae; Herpesviridae; Orthomyxoviridae; Paramyxoviridae</i> |



|               |                |                                 |     |                                                                                                                                                                   |
|---------------|----------------|---------------------------------|-----|-------------------------------------------------------------------------------------------------------------------------------------------------------------------|
| Passeriformes | Emberizidae    | Yellow-browed bunting           | 44  | <i>Caliciviridae; Retroviridae; Rotaviridae; Paramyxoviridae</i>                                                                                                  |
| Passeriformes | Estrildidae    | Waxbills and allies             | 140 | <i>Adenoviridae; Bornaviridae; Circoviridae; Coronaviridae; Orthomyxoviridae; Paramyxoviridae; Picornaviridae; Rotaviridae; Togaviridae;</i>                      |
| Passeriformes | Fringillidae   | True finches                    | 229 | <i>Adenoviridae; Astroviridae; Bornaviridae; Caliciviridae; Circoviridae; Flaviviridae; Hepeviridae; Herpesviridae; Papillomaviridae; Poxviridae; Rotaviridae</i> |
| Passeriformes | Furnariidae    | Ovenbirds and Woodcreepers      | 306 | <i>Anelloviridae</i>                                                                                                                                              |
| Passeriformes | Hirundidae     | Swallows                        | 86  | <i>Orthomyxoviridae; Togaviridae</i>                                                                                                                              |
| Passeriformes | Icteridae      | Icterids (New world blackbirds) | 105 | <i>Orthomyxoviridae; Togaviridae</i>                                                                                                                              |
| Passeriformes | Leiothrichidae | Laughingthrushes and Allies     | 143 | <i>Retroviridae</i>                                                                                                                                               |
| Passeriformes | Meliphagidae   | Honeyeaters                     | 190 | <i>Adenoviridae</i>                                                                                                                                               |
| Passeriformes | Monarchidae    | Monarch Flycatchers             | 100 | <i>Astroviridae; Poxviridae; Togaviridae;</i>                                                                                                                     |
| Passeriformes | Motacillidae   | Yellow wagtail                  | 67  | <i>Paramyxoviridae</i>                                                                                                                                            |
| Passeriformes | Muscicapidae   | Old world flycatchers           | 327 | <i>Caliciviridae; Flaviviridae; Picornaviridae; Paramyxoviridae; Retroviridae</i>                                                                                 |
| Passeriformes | Paridae        | Tits, Chickadees, and Titmice   | 63  | <i>Adenoviridae; Herpesviridae; Poxviridae; Picornaviridae; Retroviridae</i>                                                                                      |
| Passeriformes | Parulidae      | New world warblers              | 111 | <i>Adenoviridae</i>                                                                                                                                               |



|                 |                |                                           |     |                                                                                                                                                 |
|-----------------|----------------|-------------------------------------------|-----|-------------------------------------------------------------------------------------------------------------------------------------------------|
| Passeriformes   | Passeridae     | Old world sparrows                        | 43  | <i>Adenoviridae; Coronaviridae; Flaviviridae; Orthomyxoviridae; Paramyxoviridae; Pneumoviridae; Poxviridae; Retroviridae; Togaviridae,</i>      |
| Passeriformes   | Petroicidae    | Australasian Robins                       | 49  | <i>Caliciviridae; Circoviridae; Togaviridae</i>                                                                                                 |
| Passeriformes   | Phylloscopidae | Leaf Warblers                             | 79  | <i>Retroviridae</i>                                                                                                                             |
| Passeriformes   | Ploceidae      | Weavers and Allies                        | 118 | <i>Adenoviridae; Coronaviridae; Orthomyxoviridae; Paramyxoviridae</i>                                                                           |
| Passeriformes   | Prunellidae    | Accentors                                 | 13  | <i>Caliciviridae</i>                                                                                                                            |
| Passeriformes   | Pycnonotidae   | Bulbuls                                   | 151 | <i>Coronaviridae; Flaviviridae</i>                                                                                                              |
| Passeriformes   | Sturnidae      | Starlings                                 | 123 | <i>Caliciviridae; Circoviridae; Coronaviridae; Herpesviridae; Orthomyxoviridae; Paramyxoviridae</i>                                             |
| Passeriformes   | Sylviidae      | Sylviid Warblers, Parrotbills, and Allies | 69  | <i>Herpesviridae; Orthomyxoviridae</i>                                                                                                          |
| Passeriformes   | Thamnophilidae | Typical Antbirds                          | 237 | <i>Anelloviridae; Flaviviridae; Picornaviridae; hepe-like viruses</i>                                                                           |
| Passeriformes   | Thraupidae     | Tanagers and Allies                       | 381 | <i>Parvoviridae; Retroviridae</i>                                                                                                               |
| Passeriformes   | Troglodytidae  | Wrens                                     | 86  | <i>Paramyxoviridae</i>                                                                                                                          |
| Passeriformes   | Turdidae       | Thrushes and Allies                       | 174 | <i>Caliciviridae; Coronaviridae; Flaviviridae; Herpesviridae; Orthomyxoviridae; Picornaviridae; Rotaviridae; Togaviridae; hepe-like viruses</i> |
| Passeriformes   | Zosteropidae   | White-eyes, Yuhinas, and Allies           | 142 | <i>Coronaviridae; hepe-like viruses</i>                                                                                                         |
| Accipitriformes | Accipitridae   | Hawks, eagles and kites (raptors)         | 250 | <i>Flaviviridae; Orthomyxoviridae</i>                                                                                                           |
| Anseriformes    | Anatidae       | Ducks, geese, swans (waterfowl)           | 174 | <i>Orthomyxoviridae; Parvoviridae; Togaviridae</i>                                                                                              |



|                 |               |                               |     |                                                                 |
|-----------------|---------------|-------------------------------|-----|-----------------------------------------------------------------|
| Charadriiformes | Scolopaciidae | Waders and shorebirds         | 97  | <i>Orthomyxoviridae</i>                                         |
| Charadriiformes | Laridae       | Gulls and Terns               | 99  | <i>Orthomyxoviridae</i>                                         |
| Columbiformes   | Columbidae    | Pigeons                       | 348 | <i>Circoviridae; Herpesviridae; Paramyxoviridae;</i>            |
| Falconiformes   | Falconidae    | Falcons (raptors)             | 65  | <i>Orthomyxoviridae</i>                                         |
| Galliformes     | Phasianidae   | Pheasants, Grouse, and Allies | 181 | <i>Anelloviridae; Flaviviridae; Poxviridae; Togaviridae</i>     |
| Pelecaniformes  | Ardeidae      | Hérons, egrets and bitterns   | 68  | <i>Flaviviridae</i>                                             |
| Psittaciformes  | Psittacidae   | Parrots                       | 175 | <i>Circoviridae; Herpesviridae; Paramyxoviridae; Poxviridae</i> |
| Strigiformes    | Strigidae     | Owls                          | 225 | <i>Flaviviridae</i>                                             |
| Suliformes      | Sulidae       | Cormorants                    | 10  | <i>Flaviviridae</i>                                             |

1. Clements, J.; Schulenberg, T.; Iliff, M.; Billerman, S.; Fredericks, T.; Gerbracht, J.; Woods, C. Checklist of Birds of the World Available online: <https://www.birds.cornell.edu/clementschecklist/download/>. (accessed on 19 July 2023).
2. Williams, R.A.J.; Benitez, L. Chapter 5: Avian Poxvirus. In *Ecology of Wild Bird Diseases*; S. Fereidouni, Ed., CRC Press: Boca Raton, USA, In press; pp. 154–176 ISBN 978-0-8153-7945-4.
