# Supplementary material for: Emerging and Novel Viruses in Passerine Birds
Source: MDPI journal article supplement (doi:10.3390/microorganisms11092355), 2023-09-20
Supplement: s1 [file s1]

## EMERGING AND NOVEL VIRUSES IN PASSERINE BIRDS

*Richard AJ Williams<sup>1,3</sup>; Christian Sánchez<sup>1</sup>, Ana Doménech<sup>2,3</sup>, Ricardo Madrid<sup>1,3</sup>; Sergio Fandiño<sup>2,3</sup>; Pablo Cea-Calleja<sup>1,3</sup>; Esperanza Gomez-Lucia<sup>2,3</sup>, Laura Benítez<sup>1,3</sup>*

<sup>1</sup>Department of Genetics, Physiology, and Microbiology, School of Biology, Complutense University of Madrid (UCM), C. de José Antonio Nováis, 12, 28040, Madrid, Spain

<sup>2</sup>Department of Animal Health, Veterinary Faculty, Complutense University of Madrid, Av. Puerta de Hierro, s/n, 28040, Madrid, Spain

<sup>3</sup>“Animal viruses” Research Group, Complutense University of Madrid, Madrid, Spain

### **SUPPLEMENTARY MATERIAL: TABLES S4a AND S4b:** Usutu virus (USUV) detection records in class Aves

**SUPPLEMENTARY TABLE S4a:** USUV detection records recovered from class Aves, using PCR techniques or neutralization serology. USUV, or antibodies to it, has been recovered from at least 100 bird species, from 34 families and 18 orders. This list is a minimum figure, based on just 15 articles: a start. Just under half the detections (46%) are from order Passeriformes. USUV has only been detected from one study for the majority of species. It is thus striking that USUV has been detected in common blackbird in 11 of the 15 studies we used to compile this list. The column “Status” records whether the individual was captive, invasive or wild, and is left blank when the status is not clear, or with “Captive?” for exotic species, where the authors were not explicit.

| Order           | Family       | Species                        | Status  | Region              | Reference |
|-----------------|--------------|--------------------------------|---------|---------------------|-----------|
| Accipitriformes | Accipitridae | <i>Accipiter gentilis</i>      |         | Europe: Germany     | 7         |
|                 |              | <i>Aquila nipalensis</i>       |         | Europe: Germany     | 7         |
|                 |              | <i>Buteo buteo</i>             |         | Europe: Germany     | 7         |
|                 |              | <i>Circus aeruginosus</i>      | Wild    | Europe: Austria     | 9         |
|                 |              | <i>Gypaetus barbatus</i>       | Wild    | Europe: Austria     | 9         |
|                 |              | <i>Neophron percnopterus</i>   | Captive | Europe: Austria     | 3         |
|                 |              | <i>Parabuteo unicinctus</i>    |         | Europe: Germany     | 7         |
|                 |              | <i>Pernis apivorus</i>         |         | Europe: Germany     | 7         |
| Anseriformes    | Anatidae     | <i>Alopochen aegyptiaca</i>    |         | Europe: Belgium     | 2         |
|                 |              | <i>Anas platyrhynchos</i>      | Wild    | Europe: Belgium     | 2         |
|                 |              | <i>Anser anser</i>             |         | Europe: Germany     | 7         |
|                 |              | <i>Branta canadensis</i>       | Wild    | Europe: Belgium     | 2         |
|                 |              | <i>Branta ruficollis</i>       | Captive | Europe: Switzerland | 3         |
|                 |              | <i>Cygnus olor</i>             | Wild    | Europe: Belgium     | 2         |
|                 |              | <i>Dendrocygna viduata</i>     | Wild    | Africa: Madagascar  | 6         |
|                 |              | <i>Mergus squamatus</i>        |         | Europe: Germany     | 7         |
|                 |              | <i>Spatula hottentota</i>      | Wild    | Africa: Madagascar  | 6         |
|                 |              | <i>Tachyeres pteneres</i>      | Captive | Europe: Switzerland | 3         |
|                 |              | <i>Tadorna ferruginea</i>      | Captive | Europe: Switzerland | 3         |
| Apodiformes     | Apodidae     | <i>Apus apus</i>               | Wild    | Europe: Belgium     | 2         |
| Bucerotiformes  | Bucerotidae  | <i>Bycanistes sharpii</i>      | Wild    | Africa: Nigeria     | 11        |
| Ciconiiformes   | Ciconiidae   | <i>Ciconia ciconia</i>         | Captive | Europe: Austria     | 3         |
|                 |              | <i>Leptoptilos crumenifer</i>  | Captive | Europe: Switzerland | 3         |
| Columbiformes   | Columbidae   | <i>Columba livia domestica</i> |         | Europe: Belgium     | 2         |
|                 |              | <i>Columba palumbus</i>        |         | Europe: Germany     | 7         |
|                 |              | <i>Streptopelia decaocto</i>   | Wild    | Europe: Austria     | 9         |
| Coraciiformes   | Alcedinidae  | <i>Dacelo novaeguineae</i>     | Captive | Europe: Switzerland | 3         |
|                 |              | <i>Alcedo atthis</i>           | Wild    | Europe: Germany     | 1         |

|               |                |                                      |          |                     |       |
|---------------|----------------|--------------------------------------|----------|---------------------|-------|
| Falconiformes | Falconidae     | <i>Falco tinnunculus</i>             | Wild     | Europe: Austria     | 9, 10 |
| Galliformes   | Phasianidae    | <i>Gallus gallus domesticus</i>      | Captive  | Europe: Switzerland | 3     |
|               |                | <i>Pavo cristatus</i>                |          | Europe: Austria     | 9     |
|               |                | <i>Phasianus colchicus</i>           |          | Europe: Austria     | 9     |
|               |                | <i>Tetrao urogallus</i>              |          | Europe: Germany     | 7     |
| Passeriformes | Acrocephalidae | <i>Acrocephalus scirpaceus</i>       | Wild     | Europe: Austria     | 9     |
|               | Corvidae       | <i>Coccothraustes coccothraustes</i> |          | Europe: Germany     | 7     |
|               |                | <i>Coloeus monedula</i>              | Wild     | Europe: Germany     | 9, 10 |
|               |                | <i>Corvus corone</i>                 | Wild     | Europe: Germany     | 10    |
|               |                | <i>Corvus corone cornix</i>          | Wild     | Europe: Austria     | 9     |
|               |                | <i>Cyanopica cooki</i>               | Wild     | Europe: Spain       | 4     |
|               |                | <i>Garrulus glandarius</i>           | Wild     | Europe: Belgium     | 2     |
|               |                | <i>Nucifraga caryocatactes</i>       |          | Europe: Germany     | 7     |
|               |                | <i>Pica pica</i>                     | Wild     | Europe: Belgium     | 2     |
|               |                | <i>Pyrrhocorax pyrrhocorax</i>       |          | Europe: Germany     | 7     |
|               | Emberizidae    | <i>Emberiza schoeniclus</i>          | Wild     | Europe: Austria     | 9     |
|               | Estrildidae    | <i>Amandava amandava</i>             | Invasive | Europe: Spain       | 4     |
|               |                | <i>Erythrura prasina</i>             | Captive  | Europe: Germany     | 12    |
|               |                | <i>Mandingoa nitidula</i>            | Captive  | Europe: Germany     | 12    |
|               |                | <i>Taeniopygia guttata</i>           | Captive  | Europe: Germany     | 12    |
|               | Fringillidae   | <i>Chloris chloris</i>               | Wild     | Europe: Switzerland | 13    |
|               |                | <i>Chlorophonia occipitalis</i>      | Captive  | Europe: Germany     | 12    |
|               |                | <i>Fringilla coelebs</i>             | Wild     | Europe: Belgium     | 2     |
|               |                | <i>Pyrrhula erythaca</i>             | Captive? | Europe: Germany     | 10    |
|               |                | <i>Pyrrhula pyrrhula</i>             | Wild     | Europe: Germany     | 10    |
|               |                | <i>Serinus canaria domestica</i>     | Captive? | Europe: Germany     | 9, 11 |
|               | Hirundidae     | <i>Delichon urbicum</i>              | Wild     | Europe: Spain       | 4, 9  |
|               |                | <i>Hirundo rustica</i>               | Wild     | Europe: Austria     | 9     |
|               | Laniidae       | <i>Lanius senator</i>                | Wild     | Europe: Spain       | 4     |

|                     |                  |                                 |         |                     |                                   |
|---------------------|------------------|---------------------------------|---------|---------------------|-----------------------------------|
|                     | Motacillidae     | <i>Motacilla alba</i>           | Wild    | Europe: Belgium     | 2                                 |
|                     | Muscicapidae     | <i>Erithacus rubecula</i>       | Wild    | Europe: Austria     | 9, 13                             |
|                     |                  | <i>Ficedula hypoleuca</i>       | Wild    | Europe: Austria     | 5, 9                              |
|                     |                  | <i>Luscinia megarhynchos</i>    | Wild    | Europe: Spain       | 4                                 |
|                     |                  | <i>Phoenicurus ochruros</i>     | Wild    | Europe: Austria     | 9, 10                             |
|                     | Paridae          | <i>Cyanistes caeruleus</i>      | Wild    | Europe: Switzerland | 13                                |
|                     |                  | <i>Parus major</i>              | Wild    | Europe: Austria     | 5, 9                              |
|                     |                  | <i>Periparus ater</i>           |         | Europe: Germany     | 7                                 |
|                     | Passeridae       | <i>Passer domesticus</i>        | Wild    | Europe: Switzerland | 10, 13                            |
|                     | Pycnonotidae     | <i>Eurillas virens</i>          | Wild    | Africa: Nigeria     | 11                                |
|                     | Sittidae         | <i>Sitta europaea</i>           | Wild    | Europe: Austria     | 5, 9                              |
|                     | Sturnidae        | <i>Lamprotornis regius</i>      |         | Europe: Germany     | 7                                 |
|                     |                  | <i>Sturnus vulgaris</i>         | Wild    | Europe: Austria     | 9, 10                             |
|                     | Sylviidae        | <i>Sylvia atricapilla</i>       | Wild    | Europe: Austria     | 4, 9                              |
|                     |                  | <i>Sylvia borin</i>             | Wild    | Europe: Austria     | 9                                 |
|                     |                  | <i>Sylvia communis</i>          | Wild    | Europe: Austria     | 9                                 |
|                     |                  | <i>Sylvia curruca</i>           | Wild    | Europe: Austria     | 9                                 |
|                     | Troglodytidae    | <i>Troglodytes troglodytes</i>  | Wild    | Europe: Belgium     | 1                                 |
|                     | Turdidae         | <i>Turdus libonyana</i>         | Wild    | Africa: Nigeria     | 11                                |
|                     |                  | <i>Turdus merula</i>            | Wild    | Europe: Italy       | 1, 2, 4, 6, 9, 10, 12, 13, 14, 15 |
|                     |                  | <i>Turdus philomelos</i>        | Wild    | Europe: Austria     | 2, 8, 9, 10                       |
|                     |                  | <i>Turdus pilaris</i>           |         | Europe: Germany     | 7                                 |
| Pelecaniformes      | Ardeidae         | <i>Ardea cinerea</i>            |         | Europe: Germany     | 7                                 |
| Piciformes          | Picidae          | <i>Dendrocopos major</i>        | Wild    | Europe: Austria     | 9, 10                             |
|                     |                  | <i>Picus viridis</i>            |         | Europe: Germany     | 7                                 |
| Phoenicopteriformes | Phoenicopteridae | <i>Phoenicoparrus chilensis</i> |         | Europe: Germany     | 7                                 |
|                     |                  | <i>Phoenicopterus ruber</i>     | Captive | Europe: Germany     | 3                                 |
| Psittaciformes      | Cactuidae        | <i>Calyptrorhynchus banksii</i> | Captive | Europe: Germany     | 12                                |

|                 |              |                                  |          |                     |        |
|-----------------|--------------|----------------------------------|----------|---------------------|--------|
|                 |              | <i>Calyptrorhynchus baudinii</i> | Captive  | Europe: Germany     | 12     |
| Sphenisciformes | Spheniscidae | <i>Spheniscus humboldti</i>      | Captive  | Europe: Switzerland | 3      |
| Strigiformes    | Strigidae    | <i>Aegolius funereus</i>         | Captive  | Europe: Switzerland | 13     |
|                 |              | <i>Asio otus</i>                 | Wild     | Europe: Austria     | 9      |
|                 |              | <i>Athene noctua</i>             | Wild     | Europe: Germany     | 10     |
|                 |              | <i>Bubo bubo</i>                 | Captive  | Europe: Austria     | 3, 9   |
|                 |              | <i>Bubo scandiacus</i>           | Captive  | Europe: Austria     | 3      |
|                 |              | <i>Glaucidium passerinum</i>     | Captive  | Europe: Switzerland | 2, 13  |
|                 |              | <i>Strix aluco</i>               | Wild     | Europe: Austria     | 9      |
|                 |              | <i>Strix nebulosa</i>            | Captive  | Europe: Switzerland | 10, 13 |
|                 |              | <i>Strix uralensis</i>           | Captive? | Europe: Austria     | 3, 9   |
|                 |              | <i>Surnia ulula</i>              | Captive  | Europe: Switzerland | 13     |
|                 | Tytonidae    | <i>Tyto alba</i>                 | Wild     | Europe: Austria     | 9      |

**SUPPLEMENTARY TABLE S4b:** summary of detections in avian orders showing the number of positive families and species in each order, and the percent of total detections for the order.

| Order           | # of USUV positive families | # of USUV positive species | % of total USUV detections |
|-----------------|-----------------------------|----------------------------|----------------------------|
| Accipitriformes | 1                           | 8                          | 8                          |
| Anseriformes    | 1                           | 11                         | 11                         |
| Apodiformes     | 1                           | 1                          | 1                          |
| Bucerotiformes  | 1                           | 1                          | 1                          |
| Charadriiformes | 1                           | 2                          | 2                          |
| Ciconiiformes   | 1                           | 2                          | 2                          |
| Columbiformes   | 1                           | 3                          | 3                          |
| Coraciiformes   | 1                           | 2                          | 2                          |
| Falconiformes   | 1                           | 1                          | 1                          |

|                     |    |    |    |
|---------------------|----|----|----|
| Galliformes         | 1  | 4  | 4  |
| Passeriformes       | 17 | 46 | 46 |
| Pelecaniformes      | 1  | 1  | 1  |
| Piciformes          | 1  | 2  | 2  |
| Phoenicopteriformes | 1  | 2  | 2  |
| Psittaciformes      | 1  | 2  | 2  |
| Sphenisciformes     | 1  | 1  | 1  |
| Strigiformes        | 2  | 11 | 11 |

## References

1. Becker, N., et al., *Epizootic emergence of Usutu virus in wild and captive birds in Germany*. PLoS ONE, 2012. 7(2): p. e32604.
2. Benzarti, E., et al., *Usutu virus epizootic in Belgium in 2017 and 2018: evidence of virus endemization and ongoing introduction events*. Vector-Borne and Zoonotic Diseases, 2020. 20(1): p. 43-50.
3. Buchebner, N., et al., *Low Usutu virus seroprevalence in four zoological gardens in central Europe*. BMC Veterinary Research, 2013. 9: p. 1-7.
4. Bravo-Barriga, D., et al., *Identification of Usutu virus Africa 3 lineage in a survey of mosquitoes and birds from urban areas of western Spain*. Transboundary and Emerging Diseases, 2023. 2023: p. 10.
5. Chvala, S., et al., *Monitoring of Usutu virus activity and spread by using dead bird surveillance in Austria, 2003–2005*. Veterinary Microbiology, 2007. 122(3-4): p. 237-245.
6. Chevalier, V., et al., *Serological evidence of West Nile and Usutu viruses circulation in domestic and wild birds in wetlands of Mali and Madagascar in 2008*. International Journal of Environmental Research and Public Health, 2020. 17(6).
7. Günther, A., et al., *Continuous surveillance of potentially zoonotic avian pathogens detects contemporaneous occurrence of highly pathogenic avian influenza viruses (HPAIV H5) and flaviviruses (USUV, WNV) in several wild and captive birds*. Emerging Microbes & Infections, 2023. 12(2): 2231561.
8. Höfle, U., et al., *Usutu virus in migratory song thrushes, Spain*. Emerging Infectious Diseases, 2013. 19(7): p. 1173-1175.
9. Meister, T., et al., *Serological evidence of continuing high Usutu virus (Flaviviridae) activity and establishment of herd immunity in wild birds in Austria*. Veterinary Microbiology, 2008. 127(3): p. 237-248.

10. Michel, F., et al., *Evidence for West Nile virus and Usutu virus infections in wild and resident birds in Germany, 2017 and 2018*. *Viruses*, 2019. **11**(7): p. 674.
11. Nikolay, B., et al., *Usutu Virus in Africa*. *Vector-Borne and Zoonotic Diseases*, 2011. **11**(11): p. 1417-1423
12. Schmidt, V., et al., *Usutu virus infection in aviary birds during the cold season*. *Avian Pathology*, 2021. **50**(5): p. 427-435.
13. Steinmetz, H.W., et al., *Emergence and establishment of Usutu virus infection in wild and captive avian species in and around Zurich, Switzerland—genomic and pathologic comparison to other central European outbreaks*. *Veterinary Microbiology*, 2011. **148**(2-4): p. 207-212.
14. Weissenböck, H., et al., *Usutu virus, Italy, 1996*. *Emerging Infectious Diseases*, 2013. **19**(2): p. 274.
15. Weissenböck, H., et al., *Emergence of Usutu virus, an African mosquito-borne Flavivirus of the Japanese Encephalitis virus group, Central Europe*. *Emerging Infectious Disease journal*, 2002. **8**(7): p. 652.
